# Supplementary material
Source: Research Square preprint supplement (doi:10.21203/rs.3.rs-9611583/v1)
Supplement: Supplementary file 1 [file bded2496a5a223501de5a114.pdf]

# turint turint

## final manuscript.docx

 Assignment

 Science

 Unidades Tecnológicas de Santander\_DIE

---

### Document Details

Submission ID

trn:oid::1:3558449359

Submission Date

May 4, 2026, 1:53 AM GMT-5

Download Date

May 4, 2026, 1:55 AM GMT-5

File Name

final\_manuscript.docx

File Size

175.4 KB

20 Pages

4,656 Words

27,224 Characters

# 13% Overall Similarity

The combined total of all matches, including overlapping sources, for each database.

## Filtered from the Report

- ▶ Bibliography

---

### Match Groups

-  **49 Not Cited or Quoted** 10%  
Matches with neither in-text citation nor quotation marks
-  **2 Missing Quotations** 1%  
Matches that are still very similar to source material
-  **0 Missing Citation** 0%  
Matches that have quotation marks, but no in-text citation
-  **0 Cited and Quoted** 0%  
Matches with in-text citation present, but no quotation marks

### Top Sources

- 10%  Internet sources
- 14%  Publications
- 4%  Submitted works (Student Papers)

### Match Groups

- **49 Not Cited or Quoted 10%**  
Matches with neither in-text citation nor quotation marks
- **2 Missing Quotations 1%**  
Matches that are still very similar to source material
- **0 Missing Citation 0%**  
Matches that have quotation marks, but no in-text citation
- **0 Cited and Quoted 0%**  
Matches with in-text citation present, but no quotation marks

### Top Sources

- 10% Internet sources
- 14% Publications
- 4% Submitted works (Student Papers)

### Top Sources

The sources with the highest number of matches within the submission. Overlapping sources will not be displayed.

|    |                |                                                                                    |     |
|----|----------------|------------------------------------------------------------------------------------|-----|
| 1  | Student papers | Technological University Dublin                                                    | 1%  |
| 2  | Publication    | "Abstracts of 51st EASD Annual Meeting", Diabetologia, 2015                        | <1% |
| 3  | Internet       | journals.lww.com                                                                   | <1% |
| 4  | Internet       | www.ijmedicine.com                                                                 | <1% |
| 5  | Internet       | jmsronline.com                                                                     | <1% |
| 6  | Publication    | "Minutes of The 43rd General Assembly of The European Association for The Stud...  | <1% |
| 7  | Internet       | www.jmmc.mmc.edu.pk                                                                | <1% |
| 8  | Internet       | link.springer.com                                                                  | <1% |
| 9  | Publication    | &NA;, . "Abst D-FreeCommPosters :", Medicine & Science in Sports & Exercise, 2012. | <1% |
| 10 | Internet       | bmfj.journals.ekb.eg                                                               | <1% |

|    |             |                                                                                  |     |
|----|-------------|----------------------------------------------------------------------------------|-----|
| 11 | Publication | Khaled Mohammed Hassan, Kareem Khaled Elhossini, Abd Elhady Ahmed Helmy ...      | <1% |
| 12 | Publication | Papaioannou, A.I.. "Systemic and airway inflammation and the presence of emph... | <1% |
| 13 | Publication | Praveena Meyyazhagan, Thamaraiselvi Kanagaraj, Nachal Annamalai. "A cross se...  | <1% |
| 14 | Internet    | docksci.com                                                                      | <1% |
| 15 | Internet    | www.mdpi.com                                                                     | <1% |
| 16 | Internet    | www.tandfonline.com                                                              | <1% |
| 17 | Publication | Hwa Young Lee, Juyoung Shin, Hyunah Kim, Seung-Hwan Lee, Jae-Hyoung Cho, So...   | <1% |
| 18 | Internet    | behcetuzdergisi.com                                                              | <1% |

First page file

**1 Type of article:** Original Article

2 1. **Title of the article:** Assessment of pulmonary function test in type 2 diabetes mellitus  
3 and its relation to glycaemic control and duration of disease

4 2. **Running title:** Pulmonary Function in Type 2 Diabetes mellitus

5 3. **Keywords:** Type 2 diabetes mellitus; Glycaemic control; Pulmonary function tests;  
6 HbA1c; Spirometry.

**7 4. Full names of contributors**

8 1. **Ahmed mahmoud mohamed galal** <sup>1\*</sup>

9 2. **Yvette Ezzat Eid Iskandar** <sup>2</sup>

10 3. **Riham Hazem Raafat** <sup>1</sup>

**11 5. Department(s) and institution(s):**

12 <sup>1</sup> Chest Department, Faculty of Medicine, Ain Shams University ,Cairo, Egypt

13 <sup>2</sup> Internal Medicine, Diabetes and Endocrinology, Faculty of Medicine, Ain Shams  
14 University ,Cairo, Egypt

15

**16 Corresponding Author \*:**

17 **Name:** Ahmed Galal

18 **Affiliation:** Chest Department, Faculty of Medicine, Ain Shams University ,Cairo,  
19 Egypt

20 **Address:** Cairo , Egypt,

21 **Phone numbers:** +201003035809

22 **E-mail address:** ahmed\_galal07@yahoo.com

23 6. **Source(s) of support:** Nil

24 7. **Conflicting Interest:** Nil

25 8. The manuscript has been read and approved by all the authors, that the requirements  
26 for authorship as stated earlier in this document have been met, and that each author  
27 believes that the manuscript represents honest work, if that information is not provided  
28 in another form  
29

4 30 **Assessment of pulmonary function test in type 2 diabetes mellitus and its**  
31 **relation to glycaemic control and duration of disease**

32 **Abstract**

14 33 **Background:** Diabetes mellitus is a metabolic disease that affects many systems and is marked  
34 by extensive vascular problems. One large microvascular bed that may be vulnerable to diabetic  
35 microangiopathy is the pulmonary alveolar–capillary network. This study aimed to assess  
13 36 pulmonary function in patients with type 2 diabetes mellitus (T2DM) and to examine its  
37 association with glycaemic control and disease duration.

38 **Methods:** This cross-sectional observational study was conducted at Ain Shams University  
39 Hospitals between February 2025 and February 2026. A total of 150 participants were enrolled,  
40 including 50 patients with controlled T2DM ( $\text{HbA1c} \leq 7\%$ ), 50 patients with uncontrolled  
41 T2DM ( $\text{HbA1c} > 7\%$ ), and 50 age-matched healthy controls. Participants were recruited from  
42 both outpatient and inpatient settings. Data collection included fasting blood glucose, 2-hour  
43 postprandial glucose, HbA1c levels, and pulmonary function tests (PFTs).

2 44 **Results:** Baseline demographic characteristics, including age, sex, and body mass index, were  
17 45 comparable among groups. Pulmonary function parameters (FEV1, FVC, FEV1/FVC, FEF25,  
46 FEF50, and FEF25–75) were significantly reduced in the uncontrolled group, indicating both  
47 restrictive and small airway impairment. HbA1c showed significant negative correlations with  
48 all spirometric indices, while longer diabetes duration was also associated with reduced  
49 pulmonary function. Multiple regression analysis identified HbA1c as the strongest  
50 independent predictor of pulmonary function decline.

51 **Conclusion:** Uncontrolled T2DM is associated with significant impairment in pulmonary  
52 function. These findings support incorporating pulmonary function assessment into routine  
53 diabetes care.

- 54 **Key words:** Type 2 diabetes mellitus; Glycaemic control; Pulmonary function tests; HbA1c;
- 55 Spirometry.

**Introduction:**

Diabetes mellitus is a metabolic disease that affects many organs and is marked by extensive vascular problems. The pulmonary consequences of diabetes mellitus have not been sufficiently characterized, despite contradictory findings. One important microvascular unit in the lung, the alveolar capillary network, may be impacted by microangiopathy. The significant reserve of the microvascular bed makes it possible to tolerate significant loss without experiencing dyspnea. This could result in pulmonary diabetic microangiopathy being underdiagnosed clinically. Research on the pathogenesis of reduced pulmonary function is very fascinating. Normal lung mechanics and gas exchange are influenced by the health of the pulmonary connective tissue and microvasculature. The presence of nonenzymatic glycosylation, the acceleration of the aging process in connective tissue cross connections, and the modification of alveolar surfactant activity are the causes of the decline in pulmonary function tests (PFTs). <sup>(1)</sup>.

Diabetes mellitus (DM) and reduced pulmonary function have been linked for many years. Numerous studies have shown a connection between diabetes and reduced lung function. There is growing evidence that chronic hyperglycemia may have an impact on pulmonary tissue, indicating that a significant contributing factor to type 2 diabetic patients' reduced lung function is their exposure to glucose. <sup>(2)</sup>.

According to a meta-analysis of cross-sectional studies, individuals with diabetes had lower forced vital capacity (FVC) and forced expiratory volume in 1s (FEV<sub>1</sub>) than those without the disease, which is consistent with the link between diabetes and impaired lung function<sup>(3)</sup>.

Research on Type 2 Diabetes Mellitus (T2DM) shows that it is also linked to decreased pulmonary function parameters, such as forced vital capacity (FVC) and forced expiratory volume in one second (FEV<sub>1</sub>), which often exhibit a restrictive ventilatory pattern, even though pulmonary dysfunction in Type 1 diabetes has been better described<sup>(4)</sup>.

81 The expected causes include the accumulation of advanced glycation endproducts in lung tissue  
82 and persistent rise of blood glucose, which contributes to oxidative damage and inflammatory  
83 pathways that may compromise pulmonary structure and function <sup>(5)</sup>.

84 The objective of this work was to assess PFTs in T2DM and its **relation to glycaemic control**  
85 **and duration of illness**

#### 86 **Patients and Methods:**

87 This cross-sectional, observational study was executed in Ain Shams University Hospitals from  
88 February 2025 to February 2026, enrolling 50 patients with controlled type 2 DM (glycosylated  
89 haemoglobin less than or equal seven percent), 50 patients with uncontrolled type 2 DM  
90 (glycosylated haemoglobin more than 7%), and 50 age-matched individuals as controls. The  
91 patients and controls were recruited from outpatient and inpatient settings at Ain Shams  
92 University Hospitals.

#### 93 **Ethical approval**

94 The study was approved by the Ethics Committee of Ain Shams University, and informed  
95 consent was obtained from all participants.

96 **Inclusion criteria:** Participants were adults above 18 years old, including patients with  
97 controlled type 2 DM ( $HbA1c \leq 7\%$ ), patients with uncontrolled type 2 DM ( $HbA1c > 7\%$ ), and  
98 age-matched healthy controls.

99 **Exclusion criteria:** current or former smokers, participants with cough, sputum, or dyspnea,  
100 and those with known respiratory diseases such as COPD, bronchial asthma, bronchiectasis,  
101 interstitial lung disease, prior pulmonary tuberculosis, or other major systemic or cardiac  
102 illnesses that could affect pulmonary function.

103 All patients were subjected to a full detailed medical history and clinical examination,  
104 measurement of HbA1c (glycosylated hemoglobin), fasting and postprandial blood glucose,

105 and spirometry for FEV1, FVC, FEV1/FVC, FEF25, FEF50, and FEF25–75, while the control  
106 group recruited after confirm normal HbA1c then underwent only spirometry.

107 Spirometry was performed according to American Thoracic Society / European Respiratory  
108 Society (ATS/ERS) recommendations using calibrated equipment by trained personnel. At  
109 least three acceptable manoeuvres were obtained, and the best reproducible values were  
110 recorded. Predicted values were generated using manufacturer reference equations based on  
111 age, sex, and height.

112 Pre-bronchodilator spirometry was used for study comparisons. Individuals with known  
113 asthma, COPD, smoking history, or respiratory symptoms were excluded during screening.

114 Restrictive tendency was interpreted as reduced FVC with preserved/increased FEV1/FVC  
115 ratio, whereas obstructive tendency was considered when FEV1/FVC was reduced

116 **Statistical analysis:**

117 All collected data were organized, coded, and initially tabulated using Microsoft Excel 2016  
118 (Microsoft Corporation, USA). Statistical processing was carried out utilizing IBM SPSS  
119 Statistics for Windows, version 27.0 (IBM Corp., Armonk, NY, USA).

120 The distribution of continuous variables was assessed for normality utilizing the Kolmogorov–  
121 Smirnov test. Normally disseminated quantitative variables were summarized as mean  $\pm$  SD,  
122 along with minimum and maximum values. For variables that deviated from normality, data  
123 were expressed as interquartile range (IQR) and median. Categorical variables were described  
124 utilizing percentages and frequencies. Statistical significance was determined at a two-tailed p-  
125 value  $< 0.05$ . Comparisons between groups were performed utilizing one-way ANOVA or  
126 Kruskal–Wallis tests as appropriate, with post hoc analyses (Tukey HSD or Bonferroni  
127 correction). Correlation analysis was conducted utilizing Spearman's rank correlation  
128 coefficient. Multiple linear regression analysis was performed to classify independent  
129 predictors of pulmonary function.

130 **Results:**

131 This study conducted in Ain shams university hospitals either outpatients or inpatients from  
 132 February 2025 to February 2026, The study included three groups, each comprising 50  
 133 participants: controlled T2DM, uncontrolled type 2 DM, and healthy controls.

134 Table (1) shows the demographic, characteristics among controlled type 2 diabetes mellitus

135 (T2DM), uncontrolled T2DM, and healthy controls. **There were no statistically significant**

136 **differences among the three groups** regarding baseline characteristics. **The distribution of**

137 gender was non-significant ( $p = 0.723$ ), with males constituting 40%, 48%, and 44% in the

138 three groups, respectively. Age was also non-**significant between groups ( $p = 0.162$ )**, with

139 mean **of**  $53.16 \pm 5.89$  years in the controlled group,  $50.91 \pm 6.02$  years in the uncontrolled

140 group, and  $52.62 \pm 6.46$  years in controls. When categorized, age groups (<50 and >50 years)

141 remained non-significant ( $p = 0.098$ ).

142 Body mass index (BMI) values were also non-significant ( $p = 0.185$ ). The controlled T2DM

143 group showed the highest median BMI [ $27.35 (25.4\text{--}30.1)$  kg/m<sup>2</sup>], followed by the uncontrolled

144 group [ $26.55 (24.4\text{--}29.1)$  kg/m<sup>2</sup>], and controls [ $25.85 (24.4\text{--}28.2)$  kg/m<sup>2</sup>].

145 Table (1): Demographic characteristics of the studied groups.

|                          |              | Controlled type 2 DM (N=50) | Uncontrolled type 2 DM (N=50) | Controls (N=50)   | p- value           |
|--------------------------|--------------|-----------------------------|-------------------------------|-------------------|--------------------|
| Gender                   | Male         | 20 (40.0%)                  | 24 (48.0%)                    | 22 (44.0%)        | 0.723 <sup>‡</sup> |
|                          | Female       | 30 (60.0%)                  | 26 (52.0%)                    | 28 (56.0%)        |                    |
| Age (years)              | Mean± SD     | 53.16 ± 5.89                | 50.91 ± 6.02                  | 52.62 ± 6.46      | 0.162 <sup>*</sup> |
|                          | Min.- Max    | 40–65                       | 40–62                         | 40–65             |                    |
| Age group                | <50 years    | 13 (26.0%)                  | 23 (46.0%)                    | 16 (32.0%)        | 0.098 <sup>‡</sup> |
|                          | >50 years    | 37 (74.0%)                  | 27 (54.0%)                    | 34 (68.0%)        |                    |
| BMI (Kg/m <sup>2</sup> ) | Median (IQR) | 27.35 (25.4–30.1)           | 26.55 (24.4–29.1)             | 25.85 (24.4–28.2) | 0.185 <sup>#</sup> |
|                          | Min.- Max    | 20.4–38.4                   | 21.2–36.9                     | 18.8–37.0         |                    |

146 **p>0.05 is non-significant; p<0.05 is significant. \*One- Way ANOVA test, ‡ Chi-square test,**

147 **p1: p-value between controlled and uncontrolled type 2 DM, p2: p-value between controlled type 2 DM and**  
 148 **controls, p3: p-value between uncontrolled type 2 DM and controls**

149 Table (2) show analysis of glycaemic control and disease duration. The results revealed  
 150 significant differences between controlled and uncontrolled type 2 DM patients. As expected,  
 151 the uncontrolled group had higher HbA1c levels, with a median of 9.5% (IQR 9–10.1)  
 152 compared to 6.7% (IQR 6.5–6.9) in the controlled group ( $p < 0.001$ ). Similarly, **fasting blood**  
 153 **glucose (FBS) and 2-hour postprandial glucose (2-hr PP)** were significantly elevated in  
 154 uncontrolled diabetics, with median values of 192.5 mg/dL (IQR 178–207) and 282.5 mg/dL  
 155 (IQR 264–300), respectively, compared to 113 mg/dL (IQR 109–121) and 170 mg/dL (IQR  
 156 136–197) in the controlled group ( $p < 0.001$  for both). Moreover, the duration of diabetes was  
 157 longer in the uncontrolled group, with a mean of  $10.50 \pm 4.03$  years versus  $7.36 \pm 2.97$  years  
 158 in the controlled group ( $p < 0.001$ ).

159 Table (2): Clinical characteristics of the studied groups.

|                  |               | Controlled type 2 DM (N=50) | Uncontrolled type 2 DM (N=50) | p-value             |
|------------------|---------------|-----------------------------|-------------------------------|---------------------|
| HbA1c (%)        | Median (IQR)  | 6.7 (6.5–6.9)               | 9.5 (9.0–10.1)                | <0.001 <sup>#</sup> |
|                  | Min.- Max     | 5.9–7.4                     | 7.9–11.2                      |                     |
| FBS (mg/dL)      | Median (IQR)  | 113 (109–121)               | 192.5 (178–207)               | <0.001 <sup>#</sup> |
|                  | Min.- Max     | 88–132                      | 139–245                       |                     |
| 2-hr PP (mg/dL)  | Median (IQR)  | 170 (155–177)               | 282.5 (264–300)               | <0.001 <sup>#</sup> |
|                  | Min.- Max     | 136–197                     | 234–339                       |                     |
| Duration (years) | Mean $\pm$ SD | $7.36 \pm 2.97$             | $10.50 \pm 4.03$              | <0.001 <sup>*</sup> |
|                  | Min.- Max     | 1–16.30                     | 1.40–20                       |                     |

160 # Mann-Whitney U test. \* Independent Samples T test

161 PFTs showed **significant differences among the three study groups.** FEV1 (%) **was significantly**  
 162 **reduced in the uncontrolled T2DM group** ( $82.33 \pm 9.02$ ) compared to both the controlled group  
 163 ( $91.14 \pm 8.37$ ) and healthy controls ( $97.15 \pm 8.19$ ) ( $p < 0.001$ ). Post hoc analysis confirmed  
 164 significant differences between all groups indicating a progressive decline from healthy  
 165 controls to controlled and further to uncontrolled patients. **A similar pattern was observed for**  
 166 FVC (%), which **was significantly lower in the uncontrolled group** ( $79.82 \pm 8.35$ ) compared to  
 167 controlled patients ( $92.01 \pm 7.63$ ) and healthy controls ( $96.69 \pm 7.11$ ) ( $p < 0.001$ ), with  
 168 **significant pairwise differences.** The FEV1/FVC ratio showed a statistically significant overall

169 difference ( $p < 0.001$ ), with lower median values in the uncontrolled group [78.4 (75.6–81.2)]  
 170 compared to healthy controls [82.0 (78.5–84.7)], while the controlled group [79.5 (77.5–81.9)]  
 171 was intermediate. Post hoc analysis revealed non-significant difference between controlled and  
 172 uncontrolled groups ( $p_2 = 0.820$ ), whereas both differed significantly from healthy controls ( $p_1$   
 173  $< 0.001$ ,  $p_3 < 0.001$ ).

174 Regarding small airway function, FEF25 (%), FEF50 (%), and FEF25–75 (%) were all  
 175 significantly reduced in the uncontrolled T2DM group compared to both controlled patients  
 176 and healthy controls ( $p < 0.001$  for all). For FEF25 (%), all pairwise comparisons were  
 177 statistically significant ( $p < 0.001$ ). For FEF50 (%) and FEF25–75 (%), although all  
 178 comparisons were significant, the difference between controlled and uncontrolled groups was  
 179 less pronounced ( $p_1 = 0.024$  and  $p_1 = 0.012$ , respectively) compared to comparisons with  
 180 healthy controls ( $p_2$  and  $p_3 < 0.001$ ) as shown in **Table (3)**. **Figure (1)** show PFTs among  
 181 studied groups.

182 **Table (3): Pulmonary function tests among studied groups.**

|              |              | Controlled type 2 DM (N=50) | Uncontrolled type 2 DM (N=50) | Controls (N=50)  | p-value  | Post hoc analysis            |
|--------------|--------------|-----------------------------|-------------------------------|------------------|----------|------------------------------|
| FEV1 (%)     | Mean ± SD    | 91.14 ± 8.37                | 82.33 ± 9.02                  | 97.15 ± 8.19     | <0.001*  | p1<0.001, p2=0.002, p3<0.001 |
|              | Min–Max      | 72.0–107.0                  | 59.3–101.4                    | 80.6–115.3       |          |                              |
| FVC (%)      | Mean ± SD    | 92.01 ± 7.63                | 79.82 ± 8.35                  | 96.69 ± 7.11     | <0.001** | p1<0.001, p2=0.008, p3<0.001 |
|              | Min–Max      | 74.5–108.2                  | 61.5–100.9                    | 81.0–110.7       |          |                              |
| FEV1/FVC     | Median (IQR) | 79.5 (77.5–81.9)            | 78.4 (75.6–81.2)              | 82.0 (78.5–84.7) | <0.001** | p1<0.001, p2=0.820, p3<0.001 |
|              | Min–Max      | 68.9–89.2                   | 61.2–87.1                     | 71.5–89.6        |          |                              |
| FEF25 (%)    | Mean ± SD    | 90.27 ± 9.52                | 75.88 ± 9.63                  | 99.96 ± 8.52     | <0.001*  | p1<0.001, p2<0.001, p3<0.001 |
|              | Min–Max      | 71.3–114.0                  | 56.6–92.5                     | 85.4–125.4       |          |                              |
| FEF50 (%)    | Mean ± SD    | 84.77 ± 12.32               | 78.85 ± 11.69                 | 95.83 ± 9.36     | <0.001** | p1=0.024, p2<0.001, p3<0.001 |
|              | Min–Max      | 51.2–111.6                  | 48.5–105.7                    | 74.6–113.1       |          |                              |
| FEF25–75 (%) | Mean ± SD    | 83.54 ± 10.32               | 77.65 ± 10.82                 | 92.46 ± 9.42     | <0.001** | p1=0.012, p2<0.001, p3<0.001 |
|              | Min–Max      | 63.6–105.8                  | 56.3–103.3                    | 77.8–117.6       |          |                              |

183  $p > 0.05$  is non-significant;  $p \leq 0.05$  is significant. \*One- Way ANOVA test, \* Kruskal Wallis test  
 184 p1: p-value between controlled and uncontrolled type 2 DM, p2: p-value between controlled type 2 DM and  
 185 controls, p3: p-value between uncontrolled type 2 DM and controls

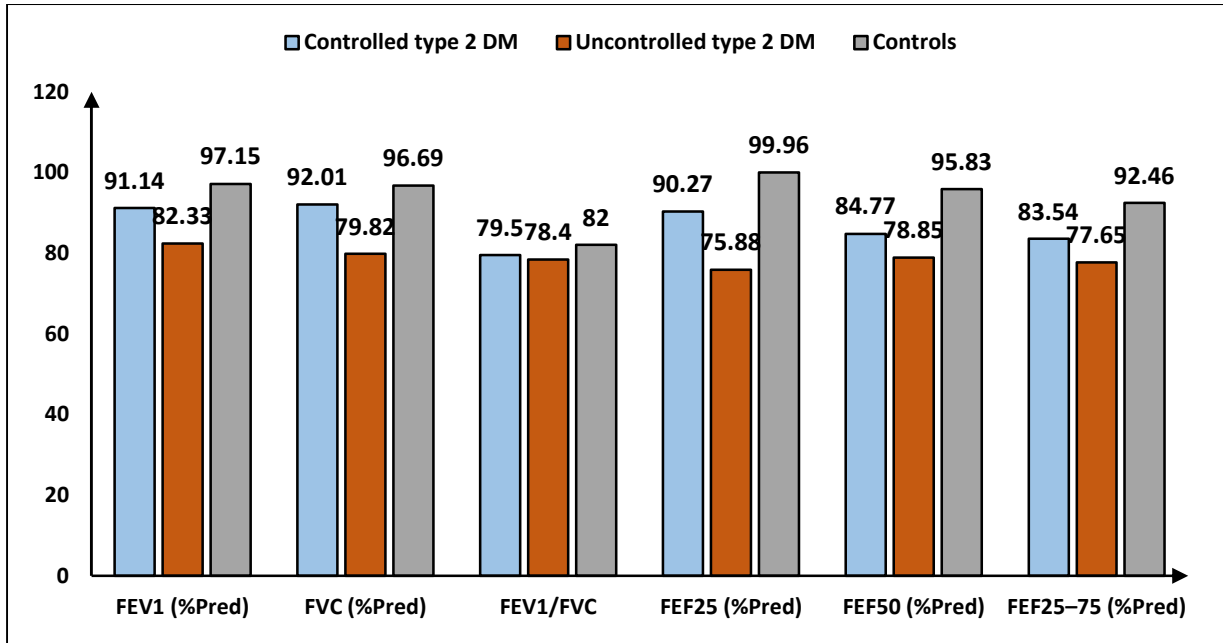

186

187

**Figure 1: Pulmonary function tests among studied groups.**

188

The correlation analysis demonstrated that glycaemic control, as reflected by HbA1c, showed a statistically significant negative associations with pulmonary function parameters.

189

190

Specifically, HbA1c was significantly inversely correlated with FEV1 ( $r = -0.385, p < 0.001$ ),

191

FVC ( $r = -0.580, p < 0.001$ ), FEF25% ( $r = -0.530, p < 0.001$ ), FEF50% ( $r = -0.211, p = 0.035$ ),

192

and non-significant correlation with FEV1/FVC ratio ( $r = -0.166, p = 0.099$ ), and FEF25–

193

75% ( $r = -0.191, p = 0.057$ ), indicating that poorer long-term glycaemic control is associated

194

with a decline in both large and small airway function.

195

**Table (4): Correlation between glycaemic control and pulmonary function tests in controlled and uncontrolled type 2 DM.**

196

197

| Pulmonary Parameter | HbA1c (r) | p-value |
|---------------------|-----------|---------|
| FEV1 (%)            | -0.385    | <0.001  |
| FVC (%)             | -0.580    | <0.001  |
| FEV1/FVC            | -0.166    | 0.099   |
| FEF25 (%)           | -0.530    | <0.001  |
| FEF50 (%)           | -0.211    | 0.035   |

198

| Pulmonary Parameter | HbA1c (r) | p-value |
|---------------------|-----------|---------|
| FEF25-75 (%)        | -0.191    | 0.057   |

198  $p > 0.05$  is non-significant;  $p \leq 0.05$  is significant. r: Spearman correlation coefficient

Scatter Plot of FEV1\_%Pred, of FVC\_%Pred, of FEV1/FVC, of FEF25\_%Pred, of FEF50\_%Pred, of FEF25\_75\_%Pred by HbA1c\_%

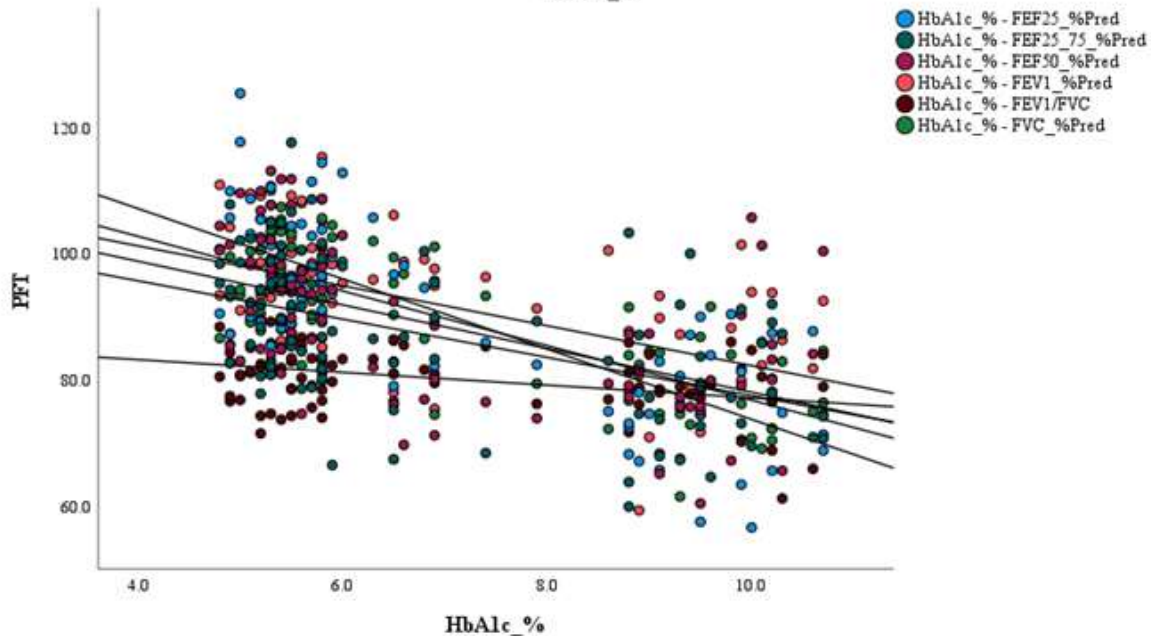

199  
200 **Figure 2: Correlation between HbA1c levels and PFT parameters in Controlled and**  
201 **uncontrolled type 2 DM patients.**

202 Table (5) show Analysis of the relationship among the duration of T2DM and pulmonary  
203 function. Diabetes duration showed significant correlations with FEV1%, FVC, FEF25%. longer  
204 disease duration was significantly associated with lower FEV1 ( $r = -0.338, p < 0.001$ ), FVC ( $r$   
205  $= -0.261, p = 0.009$ ), FEF25% ( $r = -0.265, p = 0.008$ ).

206 **Table (5): Correlation between pulmonary function and duration of diabetes.**

| Pulmonary Parameter | Duration (r) | p-value |
|---------------------|--------------|---------|
| FEV1 (%)            | -0.338       | <0.001  |
| FVC (%)             | -0.261       | 0.009   |
| FEV1/FVC            | -0.050       | 0.619   |
| FEF25 (%)           | -0.265       | 0.008   |
| FEF50 (%)           | -0.161       | 0.111   |

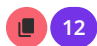

| Pulmonary Parameter | Duration (r) | p-value |
|---------------------|--------------|---------|
| FEF25–75 (%)        | -0.026       | 0.798   |

207  $p > 0.05$  is non-significant;  $p \leq 0.05$  is significant. r: Pearson/Spearman correlation coefficient

208 Table (6) show Analysis of the relationship among the BMI and pulmonary function in both  
 209 controlled and uncontrolled T2DM groups. In the controlled group, FEV1%, FVC%, FEF25%,  
 210 FEF50%, and FEF25–75% showed **no significant correlations** with BMI ( $p > 0.05$ ). However,  
 211 a **statistically significant** weak **negative correlation was** observed **between** BMI **and** FEV1/FVC  
 212 ratio ( $r = -0.313$ ,  $p = 0.027$ ). In the uncontrolled T2DM group, all pulmonary **parameters**,  
 213 **including** FEV1%, FVC%, FEV1/FVC, and small airway indices (**FEF25%**, FEF50%, FEF25–  
 214 75%), showed no significant correlations with BMI ( $p > 0.05$ ).

215 **Table (6): Correlation between pulmonary function and BMI.**

| Pulmonary parameter | BMI (Kg/m <sup>2</sup> )    |              |                               |         |
|---------------------|-----------------------------|--------------|-------------------------------|---------|
|                     | Controlled type 2 DM (N=50) |              | Uncontrolled type 2 DM (N=50) |         |
|                     | r                           | P-value      | r                             | P-value |
| FEV1 (%)            | 0.054                       | 0.708        | 0.235                         | 0.100   |
| FVC (%)             | -0.213                      | 0.137        | -0.110                        | 0.447   |
| FEV1/FVC            | -0.313                      | <b>0.027</b> | 0.040                         | 0.781   |
| FEF25 (%)           | -0.052                      | 0.719        | -0.023                        | 0.877   |
| FEF50 (%)           | 0.220                       | 0.125        | -0.007                        | 0.963   |
| FEF25–75 (%)        | 0.089                       | 0.538        | -0.001                        | 0.995   |

216  $p > 0.05$  is non-significant;  $p \leq 0.05$  is significant. r: Spearman correlation coefficient

217 Table (7) show Multiple regression analysis that was conducted to recognise independent  
 218 predictors of pulmonary function. Multiple **regression analysis revealed that HbA1c was the**  
 219 only consistent **independent predictor of** pulmonary function impairment across most  
 220 parameters. For FEV1%, HbA1c showed a significant negative association ( $B = -2.188$ ,  $\beta =$   
 221  $-0.346$ ,  $p < 0.001$ ), while age, gender, BMI, and diabetes duration were non-significant.  
 222 Similarly, for FVC%, HbA1c remained a strong negative predictor ( $B = -4.126$ ,  $\beta = -0.631$ ,  $p$   
 223  $< 0.001$ ), with all other variables showing non-significant effects. Regarding the FEV1/FVC  
 224 ratio, HbA1c also demonstrated a significant negative association ( $B = -0.783$ ,  $\beta = -0.250$ ,  $p$   
 225  $= 0.024$ ), while age, gender, BMI, and duration were non-significant. For FEF25, HbA1c (B

226 = -4.165,  $\beta = -0.534$ ,  $p < 0.001$ ) were significant predictors, indicating higher HbA1c was  
 227 associated with lower values.

228 In contrast, no variables were significant predictors of FEF50%. For FEF25–75%, HbA1c  
 229 again showed a significant negative association ( $B = -1.932$ ,  $\beta = -0.271$ ,  $p = 0.015$ ), while age,  
 230 gender, BMI, and duration were non-significant.

231 **Table (7): Multiple regression analysis to identify independent predictors of pulmonary**  
 232 **function.**

|                  | Unstandardized Coefficients |            | Standardized Coefficients | t      | P-value |
|------------------|-----------------------------|------------|---------------------------|--------|---------|
|                  | B                           | Std. Error | Beta                      |        |         |
| Age (years)      | 0.116                       | 0.146      | 0.072                     | 0.793  | 0.430   |
| Gender           | 1.949                       | 1.793      | 0.100                     | 1.087  | 0.280   |
| BMI              | 0.209                       | 0.244      | 0.079                     | 0.856  | 0.394   |
| HbA1c            | -2.188                      | 0.628      | -0.346                    | -3.484 | <0.001  |
| Duration (years) | -0.421                      | 0.249      | -0.167                    | -1.687 | 0.095   |

**a. Dependent Variable: FEV1%**

|                  | Unstandardized Coefficients |            | Standardized Coefficients | t      | P-value |
|------------------|-----------------------------|------------|---------------------------|--------|---------|
|                  | B                           | Std. Error | Beta                      |        |         |
| Age (years)      | -0.185                      | 0.135      | -0.111                    | -1.375 | 0.172   |
| Gender           | 0.883                       | 1.649      | 0.044                     | 0.536  | 0.593   |
| BMI              | -0.383                      | 0.224      | -0.140                    | -1.708 | 0.091   |
| HbA1c            | -4.126                      | 0.578      | -0.631                    | -7.139 | <0.001  |
| Duration (years) | 0.013                       | 0.229      | 0.005                     | 0.058  | 0.954   |

**a. Dependent Variable: FVC%**

|                  | Unstandardized Coefficients |            | Standardized Coefficients | t      | P-value |
|------------------|-----------------------------|------------|---------------------------|--------|---------|
|                  | B                           | Std. Error | Beta                      |        |         |
| Age (years)      | -0.051                      | 0.080      | -0.064                    | -0.640 | 0.524   |
| Gender           | -1.042                      | 0.976      | -0.108                    | -1.068 | 0.288   |
| BMI              | -0.151                      | 0.133      | -0.115                    | -1.136 | 0.259   |
| HbA1c            | -0.783                      | 0.342      | -0.250                    | -2.291 | 0.024   |
| Duration (years) | 0.030                       | 0.136      | 0.024                     | 0.224  | 0.823   |

**a. Dependent Variable: FEV1/FVC**

|                  | Unstandardized Coefficients |            | Standardized Coefficients | t      | P-value |
|------------------|-----------------------------|------------|---------------------------|--------|---------|
|                  | B                           | Std. Error | Beta                      |        |         |
| Age (years)      | 0.415                       | 0.161      | 0.209                     | 2.574  | 0.012   |
| Gender           | -2.977                      | 1.973      | -0.124                    | -1.509 | 0.135   |
| BMI              | 0.007                       | 0.268      | 0.002                     | 0.026  | 0.979   |
| HbA1c            | -4.165                      | 0.691      | -0.534                    | -6.023 | <0.001  |
| Duration (years) | -0.131                      | 0.275      | -0.042                    | -0.477 | 0.634   |

**a. Dependent Variable: FEF25 (%)**

|                                            | Unstandardized Coefficients |            | Standardized Coefficients | t      | P-value      |
|--------------------------------------------|-----------------------------|------------|---------------------------|--------|--------------|
|                                            | B                           | Std. Error | Beta                      |        |              |
| Age (years)                                | 0.228                       | 0.198      | 0.112                     | 1.150  | 0.253        |
| Gender                                     | -3.595                      | 2.428      | -0.146                    | -1.481 | 0.142        |
| BMI                                        | -0.383                      | 0.224      | -0.140                    | -1.708 | 0.091        |
| HBA1c                                      | -1.189                      | 0.851      | -0.148                    | -1.398 | 0.165        |
| Duration (years)                           | -0.290                      | 0.338      | -0.091                    | -0.860 | 0.392        |
| <b>a. Dependent Variable: FEF50 (%)</b>    |                             |            |                           |        |              |
|                                            | Unstandardized Coefficients |            | Standardized Coefficients | t      | P-value      |
|                                            | B                           | Std. Error | Beta                      |        |              |
| Age (years)                                | -0.061                      | 0.182      | -0.034                    | -0.334 | 0.739        |
| Gender                                     | 0.021                       | 2.227      | 0.001                     | 0.009  | 0.993        |
| BMI                                        | 0.246                       | 0.303      | 0.083                     | 0.814  | 0.418        |
| HBA1c                                      | -1.932                      | 0.780      | -0.271                    | -2.475 | <b>0.015</b> |
| Duration (years)                           | 0.373                       | 0.310      | 0.132                     | 1.204  | 0.231        |
| <b>a. Dependent Variable: FEF25–75 (%)</b> |                             |            |                           |        |              |

233

234 **Discussion:**

235 In the present study, baseline characteristics were comparable among the three groups, as age,  
 236 sex distribution, and BMI did not differ significantly. This reduces the likelihood that  
 237 differences in spirometric indices were related to demographic imbalance rather than diabetes  
 238 itself. Matching these variables is important because age, obesity, and sex are recognized  
 239 determinants of lung function.

240 The present study demonstrated that pulmonary function is significantly impaired in patients  
 241 with type 2 diabetes mellitus (T2DM), particularly in those with poor glycaemic control.  
 242 Patients with uncontrolled T2DM had significantly lower spirometric indices, including  
 243 FEV1%, FVC%, FEV1/FVC ratio, FEF25%, FEF50%, and FEF25–75%, compared with  
 244 controlled diabetic patients and healthy controls. These findings suggest that chronic  
 245 hyperglycaemia adversely affects both large and small airway function and may induce a mixed  
 246 restrictive and obstructive ventilatory defect.

247 In the current study, gender distribution did not differ significantly among groups, indicating  
 248 that sex is unlikely to confound the relationship between diabetes and pulmonary function. This

249 agrees with Davis et al.(6), who found no consistent association between gender and lung  
250 function decline in T2DM patients. Age also did not differ significantly between groups.  
251 Although ageing is known to reduce lung elasticity and function, regression analysis in this  
252 study demonstrated that age was not an independent predictor of PFT, suggesting that  
253 hyperglycaemia exerts a greater effect than age alone. Similar findings were reported by Klein  
254 et al.(7).

255 A major finding of this study is the reduction in pulmonary function parameters including  
256 FEV1, FVC, and mid-expiratory flow rates in uncontrolled diabetic patients compared with  
257 controlled patients and healthy controls. These findings are consistent with Meo et al.(2), who  
258 reported reduced lung volumes and airflow limitation in T2DM. Our results also agree with  
259 Benbassat et al.(8), who described similar pulmonary impairment in diabetic patients.

260 The pattern observed in the present study suggests both restrictive ( $\downarrow$ FVC) and  
261 obstructive/small airway involvement ( $\downarrow$ FEF25–75). This mixed pattern was also reported by  
262 Klein et al.(7), who concluded that diabetes affects lung mechanics through multiple  
263 pathophysiological pathways.

264 The strong negative correlations observed between glycaemic control, as indicated by HbA1c,  
265 and pulmonary function parameters further reinforce the impact of hyperglycaemia on lung  
266 health. These findings are in agreement with van den Borst et al.(3) and Yeh et al.(10), who  
267 demonstrated an inverse relationship between HbA1c levels and lung function. Proposed  
268 mechanisms include non-enzymatic glycation of collagen and elastin in lung tissue, reduced  
269 elasticity, oxidative stress, chronic low-grade inflammation, and diabetic microangiopathy  
270 affecting the pulmonary capillary network (1,11).

271 The current investigation also identified a significant negative correlation between duration of  
272 diabetes and pulmonary function parameters, indicating progressive deterioration over time.

273 This supports the hypothesis that prolonged exposure to hyperglycaemia results in cumulative

274 structural damage in lung tissue. Similar observations were reported by Davis et al.(12).  
275 Importantly, multiple regression analysis identified HbA1c as the only independent predictor  
276 of FEV1%, while age, gender, BMI, and disease duration were not significant after adjustment.  
277 This underscores the central role of glycaemic control as a modifiable risk factor in pulmonary  
278 dysfunction. Comparable results were reported by Litonjua et al.(13).  
279 In our study, correlation analysis revealed a strong and significant inverse relationship between  
280 glycaemic control and pulmonary function parameters. HbA1c was negatively correlated with  
281 FEV1 (%), FVC (%), FEF25 (%), and FEF50 (%). These findings indicate that poorer  
282 glycaemic control is closely associated with greater impairment of pulmonary function in  
283 patients with T2DM. This agrees with Nao Sonoda et al.(14), who found that HbA1c  $\geq 8.0\%$   
284 was associated with a 2.4-fold increased risk of restrictive lung impairment compared with  
285 HbA1c  $< 6.9\%$ , highlighting the importance of good glycaemic control.  
286 Debasish Barik and Sharath Babu(15) also demonstrated a significant negative correlation  
287 between HbA1c and pulmonary function parameters in patients with T2DM. Poor glycaemic  
288 control was associated with reduced FVC, FEV1, and PEFr, predominantly showing a  
289 restrictive pattern of dysfunction. Their findings support the concept that the lung may be an  
290 important target organ in diabetic complications.  
291 Our results are in strong agreement with Mittal et al.(16), who demonstrated a significant  
292 inverse correlation between disease duration and spirometric parameters, indicating that longer  
293 diabetes duration is associated with progressive pulmonary impairment. Likewise, in our study,  
294 longer diabetes duration was significantly associated with lower pulmonary function values,  
295 including FEV1, FVC, and FEF25%. These comparable findings reinforce the concept that the  
296 lung may represent another target organ affected by chronic diabetic microangiopathy and  
297 glycation-related connective tissue changes.

298 Notably, our study extends the findings of Mittal et al. by demonstrating that HbA1c was the  
299 strongest independent predictor of pulmonary dysfunction on multivariate regression analysis,  
300 suggesting that glycaemic control may have an even greater influence than disease duration  
301 alone. Therefore, while both studies confirm the cumulative harmful effect of prolonged  
302 diabetes on lung function, our results additionally emphasize the importance of strict metabolic  
303 control in preventing respiratory decline.

304 Our findings are also consistent with Maan et al.(17), who investigated the effect of HbA1c  
305 and disease duration on lung function in patients with T2DM. Similar to our results, they  
306 demonstrated that poor glycaemic control was significantly associated with impaired  
307 pulmonary function and concluded that high HbA1c had a more deleterious effect than disease  
308 duration alone. In our study, the uncontrolled diabetic group showed significantly lower FEV1,  
309 FVC, FEF25, FEF50, and FEF25–75 compared with both controlled diabetics and healthy  
310 controls. Although Maan et al. reported no significant overall correlation between disease  
311 duration and lung function, our study demonstrated a significant negative association between  
312 longer diabetes duration and most spirometric parameters. Nevertheless, both studies  
313 consistently highlight poor glycaemic control as a major determinant of pulmonary dysfunction  
314 in T2DM.

### 315 **Conclusion:**

316 Uncontrolled T2DM is associated with significant impairment in pulmonary function. Poor  
317 glycaemic control and longer disease duration are strongly linked to reduced lung function,  
318 with HbA1c emerging as the most important independent predictor. These findings highlight  
319 the position of optimal glycaemic control and support incorporating pulmonary function  
320 assessment into routine diabetes care.

321 In spite of its strengths, this study has some limitations. The generalizability of the findings  
322 may be restricted by the relatively modest sample size. Additionally, the cross-sectional design

323 renders it impossible to establish a causal relationship between hyperglycaemia and pulmonary  
324 dysfunction. Future longitudinal studies with larger populations and adding lung volumes and  
325 diffusion lung capacity are recommended to confirm these findings.

326 **Financial support and sponsorship:** Nil

327 **Conflict of Interest:** Nil

328 **References:**

- 329 1. Sandler M. Is the lung a target organ in diabetes mellitus? *Arch Intern Med.*  
330 1990;150:1385-1388.
- 331 2. Meo SA, Al-Drees AM, Arif M, Al-Rubean K. Lung function in type 2 Saudi diabetic  
332 patients. *Saudi Med J.* 2006;27:338-343.
- 333 3. Van den Borst B, Gosker HR, Zeegers MP, Schols AM. Pulmonary function in diabetes: a  
334 meta-analysis. *Chest.* 2010;138:393-406.
- 335 4. Shah SH, Sonawane P, Nahar P, Vaidya S, Salvi S. Pulmonary function tests in type 2  
336 diabetes mellitus: a case-control study. *Lung India.* 2013;30:89-94.
- 337 5. Zubair A, Husain N, Khan H, Parveen S. Pulmonary functions in patients with type 2  
338 diabetes mellitus and its correlation with glycaemic control. *Ann Thorac Med.* 2022;17:63-  
339 68.
- 340 6. Davis WA, Knuiman M, Kendall P, Vu H, Davis TM. Glycemic exposure is associated  
341 with reduced pulmonary function in type 2 diabetes. *Diabetes Care.* 2004;27:752-757.
- 342 7. Klein OL, Krishnan JA, Glick S, Smith LJ. Systematic review of the association between  
343 lung function and type 2 diabetes mellitus. *Diabet Med.* 2010;27:977-987.
- 344 8. Benbassat CA, Stern E, Kramer MR, Lebzelter J, Blum I, Fink G. Pulmonary function in  
345 patients with diabetes mellitus. *Am J Med Sci.* 2001;322:127-132.
- 346 9. Walter RE, Beiser A, Givelber RJ, O'Connor GT, Gottlieb DJ. Association between  
347 glycaemic state and lung function. *Am J Respir Crit Care Med.* 2003;167:911-916.

- 348 10. Yeh HC, Punjabi NM, Wang NY, et al. Cross-sectional and prospective study of lung  
349 function in adults with type 2 diabetes. *Diabetes Care*. 2008;31:741-746.
- 350 11. Weynand B, Jonckheere A, Frans A, Rahier J. Diabetes mellitus induces structural  
351 changes in the lung. *Eur Respir J*. 1999;13:347-353.
- 352 12. Davis TM, Knuiman M, Kendall P, et al. Reduced pulmonary function and its  
353 associations in type 2 diabetes. *Diabetes Res Clin Pract*. 2000;50:153-159.
- 354 13. Litonjua AA, Lazarus R, Sparrow D, et al. Lung function in type 2 diabetes: the  
355 Normative Aging Study. *Respir Med*. 2005;99:1583-1590.
- 356 14. Sonoda N, Morimoto A, Tatsumi Y, Asayama K, Ohkubo T, Izawa S, et al. The  
357 association between glycemic control and lung function impairment in individuals with  
358 diabetes: the Saku study. *Diabetol Int*. 2019;10:213-218.
- 359 15. Barik D, Babu SS. Correlation between pulmonary function tests and glycaemic control  
360 in patients with type 2 diabetes mellitus: a cross-sectional study. *Eur J Cardiovasc Med*.  
361 2025;15:703.
- 362 16. Mittal S, Jindal M, Srivastava S, Garg A. Duration of type 2 diabetes mellitus and  
363 pulmonary function tests: a correlative study. *Int J Diabetes Dev Ctries*. 2020;40(1):114-118.
- 364 17. Maan HB, Meo SA, Al Rouq F, Meo IMU, Gacuan ME, Alkhalifah JM. Effect of  
365 glycated hemoglobin (HbA1c) and duration of disease on lung functions in type 2 diabetic  
366 patients. *Int J Environ Res Public Health*. 2021;18:6970. doi:10.3390/ijerph18136970.

367

368

369

370

371

372
